# Supplementary material for: Genetic predisposition to tinnitus in the UK Biobank population
Source: PubMed Central journal article supplement (PMC8437971; doi:10.1038/s41598-021-97350-z), 2021-09-13
Supplement: 41598_2021_97350_MOESM2_ESM.pdf [file 41598_2021_97350_MOESM2_ESM.pdf]

493 **Genetic predisposition to tinnitus in the UK Biobank population**

494 **Madeleine E Urbanek<sup>1,2</sup>, Jian Zuo<sup>1\*</sup>**

495 1) Department of Biomedical Sciences, Creighton University School of Medicine, Omaha,  
496 Nebraska, United States of America

497 2) Department of Biology, Creighton University College of Arts and Sciences, Omaha, Nebraska,  
498 United States of America

499 \*jjanzuo@creighton.edu

500 **Supplementary Information**

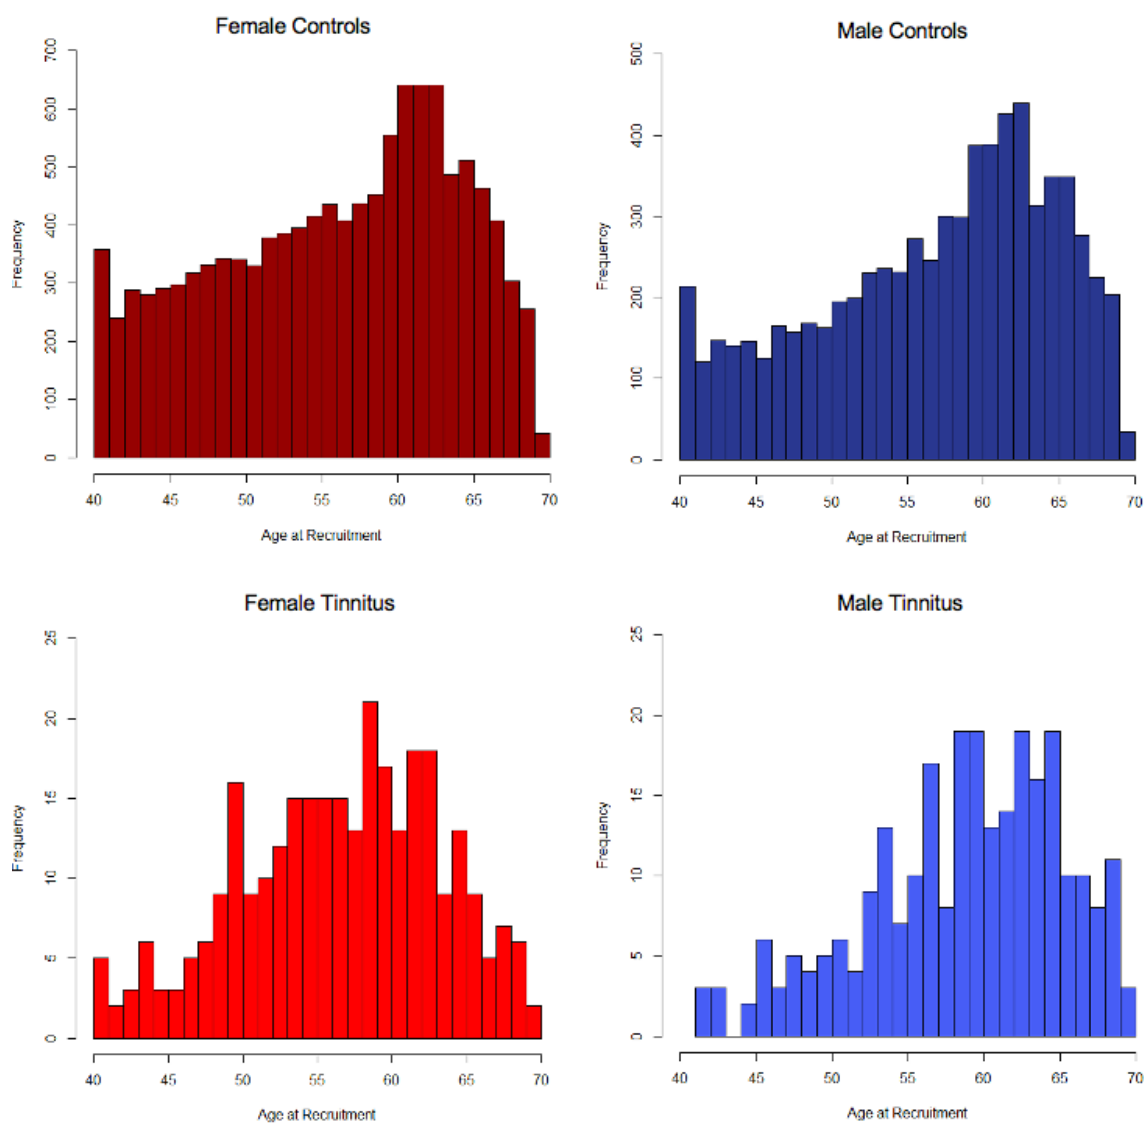

501  
502 **Fig S1.** Age distribution of all included participants in both tinnitus and control cohorts. At the  
503 time of recruitment, all participants fell between 40 and 70 years of age. In all four groups,  
504 distribution was approximately equivalent, with the peak of participants being 60-65 years old.

|                               | <b>Field Subject</b>                                        | <b>Field Number</b> | <b>Categories Excluded</b>                                |
|-------------------------------|-------------------------------------------------------------|---------------------|-----------------------------------------------------------|
| <b>Ethnicity</b>              |                                                             |                     |                                                           |
|                               | Genetic ethnic grouping                                     | 22006               | Non-Caucasian                                             |
| <b>Environment</b>            |                                                             |                     |                                                           |
|                               | Noisy workplace                                             | 4825                | Yes for $\geq 1$ year                                     |
|                               | Loud music exposure                                         | 4836                | Yes for $\geq 1$ year                                     |
| <b>Hearing</b>                |                                                             |                     |                                                           |
|                               | Hearing difficulty                                          | 2247                | Yes or total deafness                                     |
|                               | Hearing aid                                                 | 3393                | Yes                                                       |
|                               | Cochlear implant                                            | 4792                | Yes                                                       |
|                               | Unsuppurative otitis media                                  | 131229              | Death, hospital admissions, primary care records          |
|                               | Suppurative otitis media                                    | 131231              | Death, hospital admissions, primary care records          |
|                               | Eustachian obstruction                                      | 131235              | Death, hospital admissions, primary care records          |
|                               | Mastoiditis                                                 | 131239              | Death, hospital admissions, primary care records          |
|                               | Choleseatoma of middle ear                                  | 131241              | Death, hospital admissions, primary care records          |
|                               | Perforation of tympanic membrane                            | 131243              | Death, hospital admissions, primary care records          |
|                               | Otosclerosis                                                | 131251              | Death, hospital admissions, primary care records          |
|                               | Conductive and sensorineural hearing loss                   | 131259              | Death, hospital admissions, primary care records          |
|                               | Otalgia and effusion of ear                                 | 131263              | Death, hospital admissions, primary care records          |
| <b>Cardiovascular</b>         |                                                             |                     |                                                           |
|                               | Stroke                                                      | 42006               | Death, hospital admissions, primary care records          |
|                               | Hypertensive disease                                        | 131289              | Death, hospital admissions, primary care records          |
| <b>Central Nervous System</b> |                                                             |                     |                                                           |
|                               | Type of cancer                                              | 40006               | Malignant neoplasms of eye, brain, and other parts of CNS |
|                               | Bacterial meningitis                                        | 130993, 130995      | Death, hospital admissions, primary care records          |
|                               | Meningitis                                                  | 130997, 130999      | Death, hospital admissions, primary care records          |
|                               | Encephalitis, myelitis, and encephalomyelitis               | 131001, 131003      | Death, hospital admissions, primary care records          |
|                               | Intracranial and intraspinal abscess and granuloma          | 131005, 131007      | Death, hospital admissions, primary care records          |
|                               | Intracranial and intraspinal phlebitis and thrombophlebitis | 131009              | Death, hospital admissions, primary care records          |
|                               | Huntington's disease                                        | 131013              | Death, hospital admissions, primary care records          |
|                               | Hereditary ataxia                                           | 131015              | Death, hospital admissions, primary care records          |
|                               | Spinal muscular atrophy                                     | 131017              | Death, hospital admissions, primary care records          |
|                               | Postpolio syndrome                                          | 131021              | Death, hospital admissions, primary care records          |
|                               | Parkinson's disease                                         | 131023              | Death, hospital admissions, primary care records          |

|  |                                                            |        |                                                  |
|--|------------------------------------------------------------|--------|--------------------------------------------------|
|  | Secondary Parkinsonism                                     | 131025 | Death, hospital admissions, primary care records |
|  | Dystonia                                                   | 131031 | Death, hospital admissions, primary care records |
|  | Alzheimer's disease                                        | 131037 | Death, hospital admissions, primary care records |
|  | Multiple sclerosis                                         | 131043 | Death, hospital admissions, primary care records |
|  | Epilepsy                                                   | 131049 | Death, hospital admissions, primary care records |
|  | Status epilepticus                                         | 131051 | Death, hospital admissions, primary care records |
|  | Transient cerebral ischaemic attacks                       | 131057 | Death, hospital admissions, primary care records |
|  | Vascular syndromes of the brain in cerebrovascular disease | 131059 | Death, hospital admissions, primary care records |
|  | Disorders of the trigeminal nerve                          | 131063 | Death, hospital admissions, primary care records |
|  | Facial nerve disorders                                     | 131065 | Death, hospital admissions, primary care records |
|  | Nerve root and plexus disorders                            | 131071 | Death, hospital admissions, primary care records |
|  | Myasthenia gravis and other myoneural disorders            | 131093 | Death, hospital admissions, primary care records |
|  | Infantile cerebral palsy                                   | 131101 | Death, hospital admissions, primary care records |
|  | Hydrocephalus                                              | 131111 | Death, hospital admissions, primary care records |
|  | Toxic encephalopathy                                       | 131113 | Death, hospital admissions, primary care records |

506 **Table S1.** UK Biobank fields disqualified from GWAS.

507

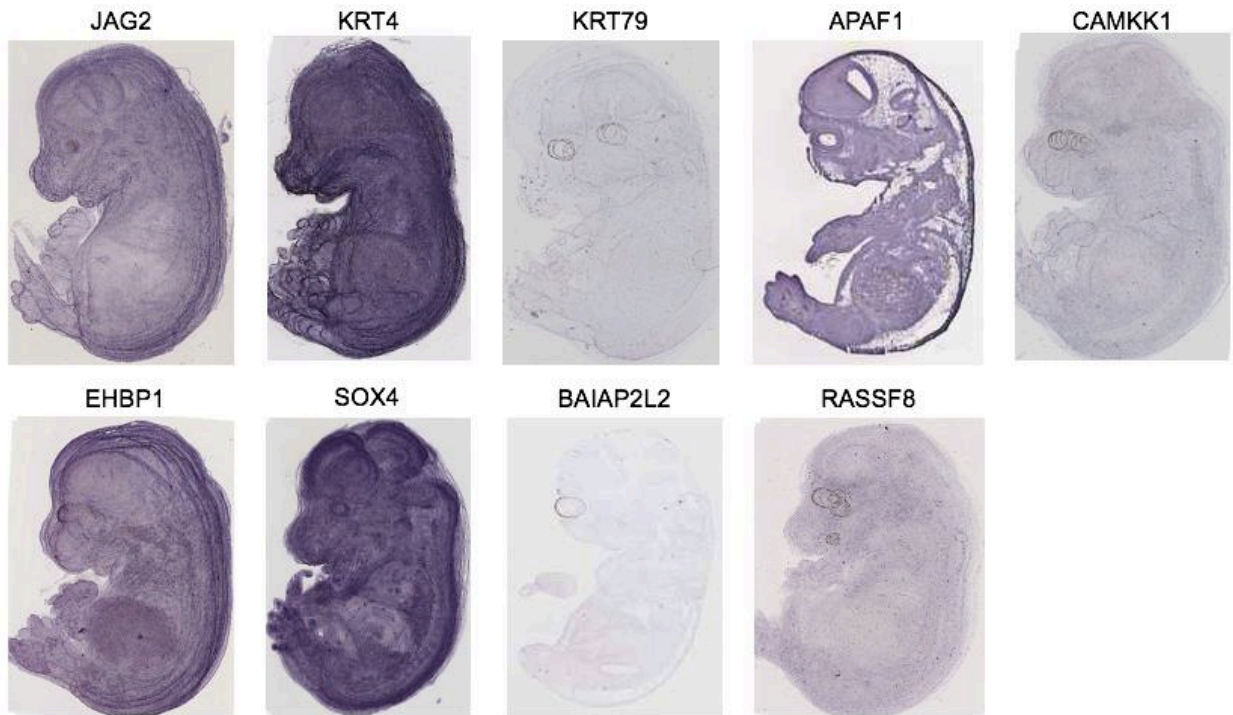

508

509 **Fig S2. *In situ* hybridization of additional gene hits in 14.5 embryonic mice.** Genes already  
510 available on the eMouseAtlas exhibit varying levels of expression in the brain during this stage  
511 of development, with *Baiap2l2* and *Krt79* showing minimal expression. Image credit: EMAGE  
512 Project (EMAGE: 3758, 16846, 14151, 12754, 14122, 12668, 13766, 29351, 11832).

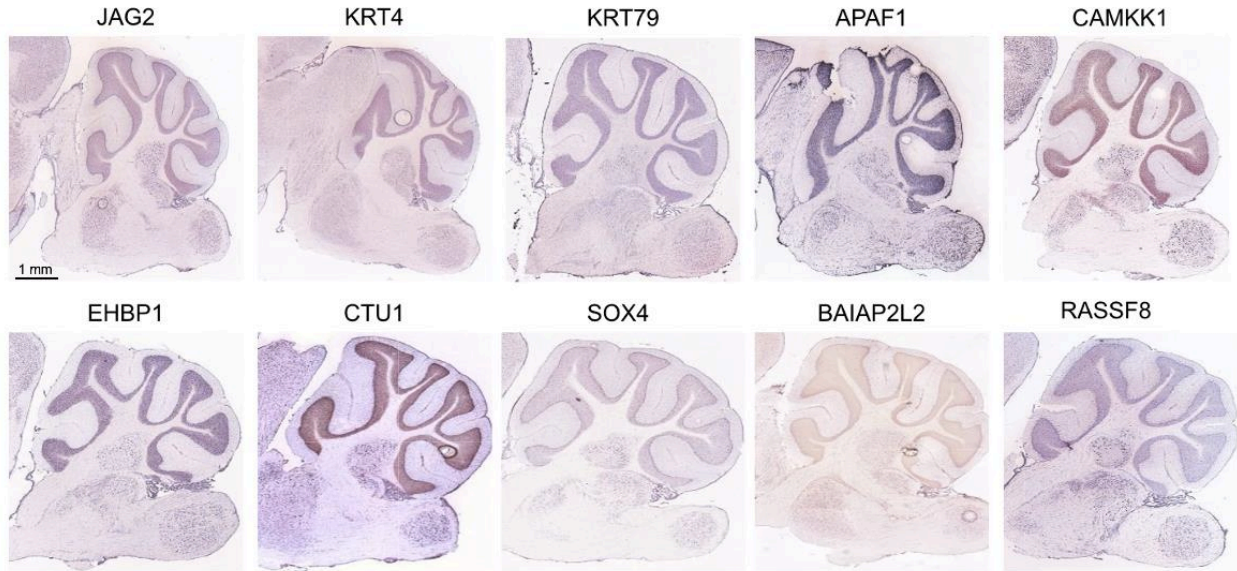

513

514 **Fig S3. *In situ* hybridization of additional gene hits in adult mice.** All genes already  
 515 recorded by the Allen Brain Atlas show some level of mRNA expression, with *Camkk1*, *Ctu1*,  
 516 and *Rassf8* showing the most elevated levels across samples. Scaling is equal across images.  
 517 Image credit: Allen Institute (<https://mouse.brain-map.org/experiment/show?id=69735652>,  
 518 <https://mouse.brain-map.org/experiment/show?id=69735956>, [https://mouse.brain-  
 520 map.org/experiment/show?id=68522308](https://mouse.brain-<br/>
  519 map.org/experiment/show?id=68522308), [https://mouse.brain-  
 522 map.org/experiment/show?id=68745275](https://mouse.brain-<br/>
  521 map.org/experiment/show?id=68745275), [https://mouse.brain-  
 524 map.org/experiment/show?id=70431211](https://mouse.brain-<br/>
  523 map.org/experiment/show?id=70431211), [https://mouse.brain-  
 526 map.org/experiment/show?id=70239099](https://mouse.brain-<br/>
  525 map.org/experiment/show?id=70239099), [https://mouse.brain-  
 map.org/experiment/show?id=413826](https://mouse.brain-<br/>
  527 map.org/experiment/show?id=413826), [https://mouse.brain-  
 map.org/experiment/show?id=81654151](https://mouse.brain-<br/>
  map.org/experiment/show?id=81654151), [https://mouse.brain-  
 map.org/experiment/show?id=74431104](https://mouse.brain-<br/>
  map.org/experiment/show?id=74431104), [https://mouse.brain-  
 map.org/experiment/show?id=69443280](https://mouse.brain-<br/>
  map.org/experiment/show?id=69443280)).

527
